# Supplementary material for: Healthy Eating and Mortality among Breast Cancer Survivors: A Systematic Review and Meta-Analysis of Cohort Studies
Source: MDPI journal article supplement (doi:10.3390/ijerph19137579), 2022-06-21
Supplement: s1 [file s1]

**Supplemental Table S1. Search Strategies.**

**Web of Science**

| <b>Search History</b> | <b>Query</b>                                                                                                                                                                                                                                                   | <b>Results</b>   |
|-----------------------|----------------------------------------------------------------------------------------------------------------------------------------------------------------------------------------------------------------------------------------------------------------|------------------|
| <b>#1</b>             | TOPIC: (breast cancer OR breast neoplasm OR breast carcinoma OR breast tumo*)<br>Indexes=SCI-EXPANDED, SSCI, A&HCI, CPCI-S, CPCI-SSH, BKCI-S, BKCI-SSH, ESCI, CCR-EXPANDED, IC Timespan=All years                                                              | <b>635,194</b>   |
| <b>#2</b>             | TOPIC: (diet* OR diet* quality OR diet* score OR diet* index)<br>Indexes=SCI-EXPANDED, SSCI, A&HCI, CPCI-S, CPCI-SSH, BKCI-S, BKCI-SSH, ESCI, CCR-EXPANDED, IC Timespan=All years                                                                              | <b>889,394</b>   |
| <b>#3</b>             | TOPIC: (recur* OR relapse)<br>Indexes=SCI-EXPANDED, SSCI, A&HCI, CPCI-S, CPCI-SSH, BKCI-S, BKCI-SSH, ESCI, CCR-EXPANDED, IC Timespan=All years                                                                                                                 | <b>964,623</b>   |
| <b>#4</b>             | TOPIC: ((mortality or mortality rate or death or death rate ) OR ( survival rate or survival outcomes or clinical outcomes ) OR prognosis)<br>Indexes=SCI-EXPANDED, SSCI, A&HCI, CPCI-S, CPCI-SSH, BKCI-S, BKCI-SSH, ESCI, CCR-EXPANDED, IC Timespan=All years | <b>3,111,197</b> |
| <b>#5</b>             | <b>#1 AND #2 AND #3</b><br>Indexes=SCI-EXPANDED, SSCI, A&HCI, CPCI-S, CPCI-SSH, BKCI-S, BKCI-SSH, ESCI, CCR-EXPANDED, IC Timespan=All years                                                                                                                    | <b>737</b>       |
| <b>#6</b>             | <b>#1 AND #2 AND #4</b><br>Indexes=SCI-EXPANDED, SSCI, A&HCI, CPCI-S, CPCI-SSH, BKCI-S, BKCI-SSH, ESCI, CCR-EXPANDED, IC Timespan=All years                                                                                                                    | <b>3469</b>      |
| <b>#7</b>             | <b>#5 OR #6</b><br>Indexes=SCI-EXPANDED, SSCI, A&HCI, CPCI-S, CPCI-SSH, BKCI-S, BKCI-SSH, ESCI, CCR-EXPANDED, IC Timespan=All years                                                                                                                            | <b>3828</b>      |
| <b>#8</b>             | <b>#5 OR #6</b><br>Refined by: LANGUAGES: ( ENGLISH OR SPANISH OR KOREAN )<br>Indexes=SCI-EXPANDED, SSCI, A&HCI, CPCI-S, CPCI-SSH, BKCI-S, BKCI-SSH, ESCI, CCR-EXPANDED, IC Timespan=All years                                                                 | <b>3760</b>      |
| <b>#9</b>             | <b>#5 OR #6</b><br>Refined by: LANGUAGES: ( ENGLISH OR SPANISH OR KOREAN ) AND TOPIC: (female OR women)<br>Indexes=SCI-EXPANDED, SSCI, A&HCI, CPCI-S, CPCI-SSH, BKCI-S, BKCI-SSH, ESCI, CCR-EXPANDED, IC Timespan=All years                                    | <b>1899</b>      |
| <b>#10</b>            | <b>#5 OR #6</b><br>Refined by: LANGUAGES: ( ENGLISH OR SPANISH OR KOREAN ) AND TOPIC: (female OR women) AND DOCUMENT TYPES: ( ARTICLE )<br>Indexes=SCI-EXPANDED, SSCI, A&HCI, CPCI-S, CPCI-SSH, BKCI-S, BKCI-SSH, ESCI, CCR-EXPANDED, IC Timespan=All years    | <b>1539</b>      |

| Search History | Query                                                                                                                                                                                | Results   |
|----------------|--------------------------------------------------------------------------------------------------------------------------------------------------------------------------------------|-----------|
| S1             | TOPIC: (breast cancer OR breast neoplasm OR breast carcinoma OR breast tumor Expanders – Apply equivalent subjects; Search modes – Find all my search terms                          | 569,3154  |
| S2             | TOPIC: (diet* OR diet* quality OR diet* score OR diet* index)                                                                                                                        | 1,138,498 |
| S3             | TOPIC: (recur* OR relapse)                                                                                                                                                           | 1,088,748 |
| S4             | TOPIC: ( mortality or mortality rate or death or death rate ) OR ( survival rate or survival outcomes or clinical outcomes ) OR prognosis)                                           | 4,555,559 |
| S5             | S1 AND S2 AND S3                                                                                                                                                                     | 1056      |
| S6             | S1 AND S2 AND S4                                                                                                                                                                     | 3881      |
| S7             | S5 OR S6                                                                                                                                                                             | 4339      |
| S8             | S5 OR S6<br>Limiters – Scholarly (Peer Reviewed) Journals; Published Date: - 20210531;<br>Human; Sex: Female; Age Related: All Adult: 19+ years; Language: English, Korean, Spanish; | 1763      |

**EBSCOhost (including Medline, CINAHL, and PsycINFO databases)**
