# Supplementary material for: Healthy Eating and Mortality among Breast Cancer Survivors: A Systematic Review and Meta-Analysis of Cohort Studies
Source: MDPI journal article supplement (doi:10.3390/ijerph19137579), 2022-06-21
Supplement: s1 [file s1]

**Table S3. Excluded studies.**

| <b>Study</b>         | <b>Title</b>                                                                                                                                                  | <b>Reason for Exclusion</b>                                                            |
|----------------------|---------------------------------------------------------------------------------------------------------------------------------------------------------------|----------------------------------------------------------------------------------------|
| Anderson 2016        | Changes in diet quality in a randomized weight loss trial in breast cancer survivors: the lifestyle, exercise, and nutrition (LEAN) study                     | Study examined diet quality without reporting associations with breast cancer outcomes |
| Farvid 2021          | Postdiagnostic Dietary Glycemic Index, Glycemic Load, Dietary Insulin Index, and Insulin Load and Breast Cancer Survival                                      | Study used other dietary index                                                         |
| Gold 2009            | Dietary pattern influences breast cancer prognosis in women without hot flashes: the women's healthy eating and living trial                                  | Not reporting/evaluating outcome of interest                                           |
| Heidemann 2008       | Dietary patterns and risk of mortality from cardiovascular disease, cancer, and all causes in a prospective cohort of women                                   | Study population included healthy general population                                   |
| Jang 2018            | Association between the Dietary Inflammatory Index and Risk for Cancer Recurrence and Mortality among Patients with Breast Cancer                             | Study used other dietary index                                                         |
| Kant 2000            | A prospective study of diet quality and mortality in women                                                                                                    | Study population included healthy general population                                   |
| Kroenke 2005         | Dietary patterns and survival after breast cancer diagnosis                                                                                                   | Study did not report any dietary score/index                                           |
| Kroenke 2013         | High- and low-fat dairy intake, recurrence, and mortality after breast cancer diagnosis.                                                                      | Study did not report any dietary score/index                                           |
| Krok-Schoen 2021     | Prevalence of lifestyle behaviors and associations with health-related quality of life among older female cancer survivors                                    | Study population included those with other than breast cancer or multiple cancers      |
| Kwan 2009            | Dietary patterns and breast cancer recurrence and survival among women with early-stage breast cancer                                                         | Study did not report any dietary score/index                                           |
| Lopez-Pentecost 2020 | Role of dietary patterns and acculturation in cancer risk and mortality among postmenopausal Hispanic women: results from the Women's Health Initiative (WHI) | Study population included healthy general population                                   |
| Marchello 2020       | Rural breast cancer survivors are able to maintain diet quality improvements during a weight loss maintenance intervention                                    | Study examined diet quality without reporting associations with breast cancer outcomes |
| Mohammadi 2013       | Association of nutritional status with quality of life in breast cancer survivors                                                                             | Not reporting/evaluating outcome of interest                                           |
| Palacios 2017        | Dietary Patterns in Puerto Rican and Mexican-American Breast Cancer Survivors: A Pilot Study                                                                  | Study examined diet quality without reporting associations with breast cancer outcomes |

|                   |                                                                                                                                                                                                |                                                                                        |
|-------------------|------------------------------------------------------------------------------------------------------------------------------------------------------------------------------------------------|----------------------------------------------------------------------------------------|
| Pierce 2007       | Influence of a diet very high in vegetables, fruit, and fiber and low in fat on prognosis following treatment for breast cancer: the Women's Healthy Eating and Living (WHEL) randomized trial | Study did not report any dietary score/index                                           |
| Prieto-Ramos 1996 | Mortality trends and past and current dietary factors of breast cancer in Spain                                                                                                                | Study did not report any dietary score/index                                           |
| Sasaki 1993       | An ecological study of the relationship between dietary fat intake and breast cancer mortality                                                                                                 | Study did not report any dietary score/index                                           |
| Springfield 2019  | Adherence to American Cancer Society and American Institute of Cancer Research dietary guidelines in overweight African American breast cancer survivors                                       | Study examined diet quality without reporting associations with breast cancer outcomes |
| Thomson 2014      | Nutrition and physical activity cancer prevention guidelines, cancer risk, and mortality in the women's health initiative                                                                      | Study population included healthy general population                                   |
| Wang 2020         | Long-term anti-inflammatory diet in relation to improved breast cancer prognosis: a prospective cohort study                                                                                   | Study used other dietary index                                                         |
| Zucchetto 2017    | Dietary inflammatory index before diagnosis and survival in an Italian cohort of women with breast cancer                                                                                      | Study used other dietary index                                                         |
