# Supplementary material for: Healthy Eating and Mortality among Breast Cancer Survivors: A Systematic Review and Meta-Analysis of Cohort Studies
Source: MDPI journal article supplement (doi:10.3390/ijerph19137579), 2022-06-21
Supplement: s1 [file s1]

**Supplemental Table S2. Quality Assessment of Included Studies.**

| Author, Year        | Assessment Domain |   |   |   |               |   |          |   |   | Total Score |
|---------------------|-------------------|---|---|---|---------------|---|----------|---|---|-------------|
|                     | Selection         |   |   |   | Comparability |   | Outcomes |   |   |             |
|                     | A                 | B | C | D | E             | F | G        | H | I |             |
| Kim, 2011           | -                 | * | - | * | *             | * | *        | * | - | 6           |
| George, 2011        | *                 | * | - | * | *             | - | *        | - | * | 6           |
| Izano, 2013         | -                 | * | - | * | *             | * | *        | * | - | 6           |
| George, 2014        | *                 | * | - | * | *             | * | *        | - | * | 7           |
| McCullough, 2016    | *                 | * | - | * | *             | * | *        | * | - | 7           |
| Deshmukh, 2018      | -                 | * | * | * | *             | - | *        | * | - | 6           |
| Sun 2018            | *                 | * | - | * | *             | * | *        | * | * | 8           |
| Karavasiloglou 2019 | -                 | * | * | * | *             | * | *        | * | - | 7           |
| Di Maso, 2020       | *                 | * | - | * | *             | * | *        | * | * | 8           |
| Wang, 2020          | *                 | * | - | * | *             | * | *        | * | * | 8           |
| Ergas 2021          | *                 | * | - | * | *             | * | *        | * | * | 8           |

A summary score was calculated using the Newcastle-Ottawa Scale for cohort studies, and studies that received a score of 6 or above were considered as high quality.

**Selection (maximum 4 stars):**

A = Representativeness of the exposed cohort

B = Selection of the non-exposed cohort

C = Ascertainment of exposure

D = Demonstration that outcome of interest was not present at start of study

**Comparability (maximum 2 stars):**

Comparability of cohorts on the basis of the design or analysis controlled for confounders

E = The study controls for age, menopausal status, and body mass index.

F = The study controls for other factors (list) including total energy intake and cancer stage.

**Outcomes (maximum 3 stars):**

G = Ascertainment of outcome

H = Was follow-up long enough for outcomes to occur

I = Adequacy of follow-up of cohorts
