# Supplementary material for: Healthy Eating and Mortality among Breast Cancer Survivors: A Systematic Review and Meta-Analysis of Cohort Studies
Source: Int J Environ Res Public Health. 2022 Jun 21;19(13):7579. doi: 10.3390/ijerph19137579 (PMC9266181; doi:10.3390/ijerph19137579)
Supplement: Supplementary file 1 [file ijerph-19-07579-s001.zip]

Archive with 4 entries (4 files):
- Table S1 Search Strategies.pdf
- Table S2 Quality Assessment of Included Studies.pdf
- Table S3 Excluded Studies.pdf
- Table S4 Quality of Evidence.pdf
